# Supplementary material for: Th@C86, Th@C82, Th@C80, and Th@C76: role of thorium encapsulation in determining spherical aromatic and bonding properties on medium-sized endohedral metallofullerenes
Source: Royal Society of Chemistry journal article supplement (doi:10.1039/d0cp03784b), 2020-01-01
Supplement: d0cp03784b1.pdf [file d0cp03784b1.pdf]

--- Supporting Information for: ---

**Th@C<sub>86</sub>, Th@C<sub>82</sub>, Th@C<sub>80</sub>, and Th@C<sub>76</sub>. Role of Thorium Encapsulation in Determining Spherical Aromatic and Bonding Properties on Medium-Sized Endohedral Metallic Fullerenes**

Alvaro Muñoz-Castro and R. Bruce King

Laboratorio de Química Inorgánica y Materiales Moleculares, Universidad Autonoma de Chile, Llano Subercaseaux 2801, San Miguel, Santiago, Chile.

Department of Chemistry, University of Georgia, Athens, Georgia 30602, USA.

Content:

Table S1. Coordinates and shielding tensor parameters for all carbon atoms for Th@C<sub>76</sub>, Th@C<sub>80</sub>, Th@C<sub>82</sub>, and Th@C<sub>86</sub>. Summarized values are given on main text.

Figure S1. Most shielded carbon atoms of Th@C<sub>82</sub>.

Table S2. Energy decomposition analysis for the Th-Fullerene interaction. Values in kcal mol<sup>-1</sup>.

Th@C<sub>76</sub>

|   | X       | Y       | Z       | $\sigma_{11}$ | $\sigma_{22}$ | $\sigma_{33}$ | $\sigma_{iso}$ | $\sigma_{anis}$ | $\sigma_{asym}$ | $\delta$ vs TMS | $\delta$ vs C <sub>60</sub> |
|---|---------|---------|---------|---------------|---------------|---------------|----------------|-----------------|-----------------|-----------------|-----------------------------|
| C | -3.2178 | 0.7264  | 2.8193  | -25.8         | -10.6         | 138.7         | 34.1           | 156.9           | 0.15            | 152.6           | 147.2                       |
| C | -3.2178 | -0.7264 | 2.8193  | -25.8         | -10.6         | 138.7         | 34.1           | 156.9           | 0.15            | 152.6           | 147.2                       |
| C | 0.9798  | -3.1499 | 2.8193  | -25.8         | -10.5         | 138.7         | 34.1           | 156.8           | 0.15            | 152.6           | 147.2                       |
| C | 0.9798  | 3.1499  | 2.8193  | -25.8         | -10.5         | 138.7         | 34.1           | 156.8           | 0.15            | 152.6           | 147.2                       |
| C | 2.2380  | 2.4235  | 2.8193  | -25.7         | -10.5         | 138.7         | 34.2           | 156.7           | 0.15            | 152.5           | 147.1                       |
| C | 2.2380  | -2.4235 | 2.8193  | -25.7         | -10.5         | 138.7         | 34.2           | 156.7           | 0.15            | 152.5           | 147.1                       |
| C | -1.4064 | 0.0000  | 4.0592  | -38.0         | 14.4          | 130.2         | 35.5           | 142.0           | 0.55            | 151.1           | 145.7                       |
| C | 0.7032  | 1.2180  | 4.0592  | -37.9         | 14.5          | 130.2         | 35.6           | 141.9           | 0.55            | 151.1           | 145.7                       |
| C | 0.7032  | -1.2180 | 4.0592  | -37.9         | 14.5          | 130.2         | 35.6           | 141.9           | 0.55            | 151.1           | 145.7                       |
| C | 3.0539  | -2.4423 | 1.6876  | -25.3         | -11.8         | 145.7         | 36.2           | 164.2           | 0.12            | 150.5           | 145.1                       |
| C | 3.0539  | 2.4423  | 1.6876  | -25.3         | -11.8         | 145.7         | 36.2           | 164.2           | 0.12            | 150.5           | 145.1                       |
| C | 0.5882  | 3.8659  | 1.6876  | -25.3         | -11.8         | 145.7         | 36.2           | 164.2           | 0.12            | 150.5           | 145.1                       |
| C | 0.5882  | -3.8659 | 1.6876  | -25.3         | -11.8         | 145.7         | 36.2           | 164.2           | 0.12            | 150.5           | 145.1                       |
| C | -3.6421 | 1.4236  | 1.6876  | -25.3         | -11.7         | 145.6         | 36.2           | 164.1           | 0.12            | 150.5           | 145.1                       |
| C | -3.6421 | -1.4236 | 1.6876  | -25.3         | -11.7         | 145.6         | 36.2           | 164.1           | 0.12            | 150.5           | 145.1                       |
| C | 0.9444  | 3.0993  | -1.7945 | -13.1         | -8.1          | 139.8         | 39.5           | 150.4           | 0.05            | 147.2           | 141.8                       |
| C | 0.9444  | -3.0993 | -1.7945 | -13.1         | -8.1          | 139.8         | 39.5           | 150.4           | 0.05            | 147.2           | 141.8                       |
| C | -3.1563 | 0.7317  | -1.7945 | -13.1         | -8.1          | 139.8         | 39.5           | 150.4           | 0.05            | 147.1           | 141.8                       |
| C | -3.1563 | -0.7317 | -1.7945 | -13.1         | -8.1          | 139.8         | 39.5           | 150.4           | 0.05            | 147.1           | 141.8                       |

|   |         |         |         |       |      |       |      |       |      |       |       |
|---|---------|---------|---------|-------|------|-------|------|-------|------|-------|-------|
| C | 2.2118  | 2.3675  | -1.7945 | -13.1 | -8.1 | 139.8 | 39.5 | 150.4 | 0.05 | 147.1 | 141.8 |
| C | 2.2118  | -2.3675 | -1.7945 | -13.1 | -8.1 | 139.8 | 39.5 | 150.4 | 0.05 | 147.1 | 141.8 |
| C | -1.7808 | -3.0844 | 2.0027  | -22.2 | -1.9 | 143.1 | 39.7 | 155.1 | 0.20 | 147.0 | 141.6 |
| C | -1.7808 | 3.0844  | 2.0027  | -22.2 | -1.9 | 143.1 | 39.7 | 155.1 | 0.20 | 147.0 | 141.6 |
| C | 3.5616  | 0.0000  | 2.0027  | -22.1 | -1.8 | 143.1 | 39.7 | 155.1 | 0.20 | 147.0 | 141.6 |
| C | 2.7072  | 0.0000  | 3.2027  | -16.9 | -4.1 | 141.0 | 40.0 | 151.5 | 0.13 | 146.7 | 141.3 |
| C | -1.3536 | -2.3445 | 3.2027  | -17.0 | -4.0 | 141.0 | 40.0 | 151.5 | 0.13 | 146.7 | 141.3 |
| C | -1.3536 | 2.3445  | 3.2027  | -17.0 | -4.0 | 141.0 | 40.0 | 151.5 | 0.13 | 146.7 | 141.3 |
| C | 2.6448  | -3.1720 | 0.5173  | -23.8 | -3.7 | 150.0 | 40.8 | 163.8 | 0.18 | 145.8 | 140.4 |
| C | 2.6448  | 3.1720  | 0.5173  | -23.8 | -3.7 | 150.0 | 40.8 | 163.8 | 0.18 | 145.8 | 140.4 |
| C | 1.4247  | -3.8765 | 0.5173  | -23.8 | -3.7 | 150.0 | 40.8 | 163.8 | 0.18 | 145.8 | 140.4 |
| C | 1.4247  | 3.8765  | 0.5173  | -23.8 | -3.7 | 150.0 | 40.9 | 163.8 | 0.18 | 145.8 | 140.4 |
| C | -4.0695 | 0.7044  | 0.5173  | -23.8 | -3.7 | 150.0 | 40.9 | 163.7 | 0.18 | 145.8 | 140.4 |
| C | -4.0695 | -0.7044 | 0.5173  | -23.8 | -3.7 | 150.0 | 40.9 | 163.7 | 0.18 | 145.8 | 140.4 |
| C | -2.0865 | -1.1782 | 3.5765  | -19.0 | 2.4  | 145.3 | 42.9 | 153.6 | 0.21 | 143.8 | 138.4 |
| C | -2.0865 | 1.1782  | 3.5765  | -19.0 | 2.4  | 145.3 | 42.9 | 153.6 | 0.21 | 143.8 | 138.4 |
| C | 2.0636  | -1.2179 | 3.5765  | -19.0 | 2.5  | 145.3 | 42.9 | 153.5 | 0.21 | 143.8 | 138.4 |
| C | 2.0636  | 1.2179  | 3.5765  | -19.0 | 2.5  | 145.3 | 42.9 | 153.5 | 0.21 | 143.8 | 138.4 |
| C | 0.0229  | -2.3961 | 3.5765  | -19.0 | 2.5  | 145.3 | 42.9 | 153.6 | 0.21 | 143.7 | 138.3 |
| C | 0.0229  | 2.3961  | 3.5765  | -19.0 | 2.5  | 145.3 | 42.9 | 153.6 | 0.21 | 143.7 | 138.3 |
| C | -2.9073 | -2.5997 | 1.2674  | -20.7 | 6.1  | 145.2 | 43.6 | 152.5 | 0.26 | 143.1 | 137.7 |
| C | -2.9073 | 2.5997  | 1.2674  | -20.7 | 6.1  | 145.2 | 43.6 | 152.5 | 0.26 | 143.1 | 137.7 |
| C | -0.7978 | 3.8177  | 1.2674  | -20.6 | 6.3  | 145.2 | 43.6 | 152.4 | 0.26 | 143.0 | 137.6 |
| C | -0.7978 | -3.8177 | 1.2674  | -20.6 | 6.3  | 145.2 | 43.6 | 152.4 | 0.26 | 143.0 | 137.6 |
| C | 3.7051  | -1.2179 | 1.2674  | -20.6 | 6.3  | 145.3 | 43.6 | 152.4 | 0.26 | 143.0 | 137.6 |
| C | 3.7051  | 1.2179  | 1.2674  | -20.6 | 6.3  | 145.3 | 43.7 | 152.4 | 0.26 | 143.0 | 137.6 |
| C | -1.4775 | 2.5591  | -2.1169 | -2.6  | 0.9  | 132.9 | 43.7 | 133.8 | 0.04 | 143.0 | 137.6 |
| C | -1.4775 | -2.5591 | -2.1169 | -2.6  | 0.9  | 132.9 | 43.7 | 133.8 | 0.04 | 143.0 | 137.6 |
| C | 2.9549  | 0.0000  | -2.1169 | -2.5  | 0.8  | 132.9 | 43.7 | 133.8 | 0.04 | 143.0 | 137.6 |
| C | -3.5974 | -1.4173 | -0.6369 | -22.4 | 18.0 | 145.6 | 47.1 | 147.8 | 0.41 | 139.6 | 134.2 |
| C | -3.5974 | 1.4173  | -0.6369 | -22.4 | 18.0 | 145.6 | 47.1 | 147.8 | 0.41 | 139.6 | 134.2 |
| C | 3.0261  | 2.4068  | -0.6369 | -22.5 | 18.1 | 145.6 | 47.1 | 147.7 | 0.41 | 139.6 | 134.2 |
| C | 3.0261  | -2.4068 | -0.6369 | -22.5 | 18.1 | 145.6 | 47.1 | 147.7 | 0.41 | 139.6 | 134.2 |
| C | 0.5713  | 3.8241  | -0.6369 | -22.5 | 18.1 | 145.6 | 47.1 | 147.7 | 0.41 | 139.6 | 134.2 |
| C | 0.5713  | -3.8241 | -0.6369 | -22.5 | 18.1 | 145.6 | 47.1 | 147.7 | 0.41 | 139.6 | 134.2 |
| C | 0.0008  | 1.4551  | -3.5397 | 3.1   | 22.2 | 130.2 | 51.8 | 117.6 | 0.24 | 134.9 | 129.5 |
| C | 0.0008  | -1.4551 | -3.5397 | 3.1   | 22.2 | 130.2 | 51.8 | 117.6 | 0.24 | 134.9 | 129.5 |
| C | -1.2606 | 0.7268  | -3.5397 | 3.1   | 22.3 | 130.2 | 51.9 | 117.5 | 0.25 | 134.8 | 129.4 |
| C | -1.2606 | -0.7268 | -3.5397 | 3.1   | 22.3 | 130.2 | 51.9 | 117.5 | 0.25 | 134.8 | 129.4 |
| C | 1.2597  | 0.7283  | -3.5397 | 3.1   | 22.2 | 130.2 | 51.9 | 117.5 | 0.24 | 134.8 | 129.4 |
| C | 1.2597  | -0.7283 | -3.5397 | 3.1   | 22.2 | 130.2 | 51.9 | 117.5 | 0.24 | 134.8 | 129.4 |
| C | 3.7348  | -1.2180 | -0.1627 | -18.8 | 40.5 | 135.1 | 52.3 | 124.3 | 0.72 | 134.4 | 129.0 |
| C | 3.7348  | 1.2180  | -0.1627 | -18.8 | 40.5 | 135.1 | 52.3 | 124.3 | 0.72 | 134.4 | 129.0 |

|    |         |         |         |       |      |       |      |       |      |       |       |
|----|---------|---------|---------|-------|------|-------|------|-------|------|-------|-------|
| C  | -2.9222 | -2.6255 | -0.1627 | -18.8 | 40.5 | 135.1 | 52.3 | 124.3 | 0.72 | 134.4 | 129.0 |
| C  | -2.9222 | 2.6255  | -0.1627 | -18.8 | 40.5 | 135.1 | 52.3 | 124.3 | 0.72 | 134.4 | 129.0 |
| C  | -0.8126 | 3.8435  | -0.1627 | -18.8 | 40.6 | 135.1 | 52.3 | 124.2 | 0.72 | 134.4 | 129.0 |
| C  | -0.8126 | -3.8435 | -0.1627 | -18.8 | 40.6 | 135.1 | 52.3 | 124.2 | 0.72 | 134.4 | 129.0 |
| C  | 0.0000  | 0.0000  | 4.2624  | -0.3  | -0.3 | 159.5 | 53.0 | 159.8 | 0.00 | 133.7 | 128.3 |
| C  | 2.2803  | 1.1649  | -2.6117 | 8.7   | 18.2 | 133.2 | 53.4 | 119.8 | 0.12 | 133.3 | 127.9 |
| C  | 2.2803  | -1.1649 | -2.6117 | 8.7   | 18.2 | 133.2 | 53.4 | 119.8 | 0.12 | 133.3 | 127.9 |
| C  | -0.1313 | 2.5572  | -2.6117 | 8.7   | 18.2 | 133.2 | 53.4 | 119.7 | 0.12 | 133.3 | 127.9 |
| C  | -0.1313 | -2.5572 | -2.6117 | 8.7   | 18.2 | 133.2 | 53.4 | 119.7 | 0.12 | 133.3 | 127.9 |
| C  | -2.1490 | 1.3923  | -2.6117 | 8.7   | 18.3 | 133.2 | 53.4 | 119.7 | 0.12 | 133.3 | 127.9 |
| C  | -2.1490 | -1.3923 | -2.6117 | 8.7   | 18.2 | 133.2 | 53.4 | 119.7 | 0.12 | 133.3 | 127.9 |
| C  | -1.8374 | 3.1824  | -0.8798 | -4.4  | 3.1  | 165.4 | 54.7 | 166.0 | 0.07 | 132.0 | 126.6 |
| C  | -1.8374 | -3.1824 | -0.8798 | -4.4  | 3.1  | 165.4 | 54.7 | 166.0 | 0.07 | 132.0 | 126.6 |
| C  | 3.6747  | 0.0000  | -0.8798 | -4.4  | 3.1  | 165.4 | 54.7 | 166.0 | 0.07 | 132.0 | 126.6 |
| Th | 0.0000  | 0.0000  | -1.5022 |       |      |       |      |       |      |       |       |

Th@C<sub>80</sub>

|   |         |         |         |               |               |               |                |                 |                 |                 |                             |
|---|---------|---------|---------|---------------|---------------|---------------|----------------|-----------------|-----------------|-----------------|-----------------------------|
|   | X       | Y       | Z       | $\sigma_{11}$ | $\sigma_{22}$ | $\sigma_{33}$ | $\sigma_{iso}$ | $\sigma_{anis}$ | $\sigma_{asym}$ | $\delta$ vs TMS | $\delta$ vs C <sub>60</sub> |
| C | -3.2410 | -0.5586 | -2.4141 | -44.3         | -38.8         | 135.7         | 17.5           | 177.2           | 0.05            | 169.2           | 163.8                       |
| C | -3.6723 | -1.5940 | -0.2575 | -43.9         | -18.1         | 137.0         | 25.0           | 168.0           | 0.23            | 161.7           | 156.3                       |
| C | 1.9585  | -3.5174 | -0.4144 | -38.2         | -29.5         | 144.8         | 25.7           | 178.6           | 0.07            | 160.9           | 155.6                       |
| C | 0.1899  | -3.9444 | 1.2220  | -49.1         | -16.9         | 145.2         | 26.4           | 178.2           | 0.27            | 160.3           | 154.9                       |
| C | -0.2166 | 0.6174  | 4.6506  | -33.6         | -11.9         | 126.7         | 27.1           | 149.4           | 0.22            | 159.6           | 154.2                       |
| C | -0.9273 | 1.5809  | -4.0984 | -45.6         | -17.2         | 144.9         | 27.4           | 176.2           | 0.24            | 159.3           | 153.9                       |
| C | -0.4714 | 2.8564  | -3.5816 | -43.7         | -21.4         | 147.8         | 27.6           | 180.3           | 0.19            | 159.1           | 153.7                       |
| C | -1.7132 | -3.5518 | -0.8535 | -37.2         | -26.4         | 146.7         | 27.7           | 178.5           | 0.09            | 159.0           | 153.6                       |
| C | -1.2943 | 1.3553  | 4.0517  | -34.3         | -18.0         | 137.6         | 28.4           | 163.7           | 0.15            | 158.2           | 152.9                       |
| C | -2.4270 | 2.8969  | -2.0652 | -34.1         | -31.0         | 150.6         | 28.5           | 183.1           | 0.03            | 158.2           | 152.8                       |
| C | -1.1999 | 3.4889  | -2.5557 | -39.9         | -21.2         | 148.3         | 29.1           | 178.9           | 0.16            | 157.6           | 152.2                       |
| C | -0.5166 | -0.8067 | 4.5354  | -32.8         | -20.1         | 141.1         | 29.4           | 167.5           | 0.11            | 157.3           | 151.9                       |
| C | -2.2762 | -0.3645 | -3.4669 | -35.8         | -23.5         | 151.4         | 30.7           | 181.1           | 0.10            | 156.0           | 150.6                       |
| C | 0.9705  | 2.8089  | -3.5132 | -41.1         | -16.4         | 150.1         | 30.9           | 178.9           | 0.21            | 155.8           | 150.4                       |
| C | 2.5397  | -0.5280 | -3.2456 | -36.5         | -23.1         | 153.8         | 31.4           | 183.6           | 0.11            | 155.3           | 149.9                       |
| C | -0.3310 | -3.8092 | -1.1685 | -27.0         | -19.5         | 141.7         | 31.7           | 164.9           | 0.07            | 154.9           | 149.6                       |
| C | 1.6459  | 3.3886  | -2.4298 | -32.3         | -21.6         | 149.8         | 32.0           | 176.8           | 0.09            | 154.7           | 149.3                       |
| C | -3.8937 | -0.2905 | 0.3080  | -40.6         | -16.3         | 153.0         | 32.1           | 181.5           | 0.20            | 154.6           | 149.2                       |
| C | -0.0155 | -3.1111 | -2.3904 | -31.6         | -24.9         | 152.7         | 32.1           | 181.0           | 0.05            | 154.6           | 149.2                       |
| C | 3.4422  | -0.7705 | -2.1398 | -42.8         | -3.5          | 143.2         | 32.3           | 166.4           | 0.35            | 154.4           | 149.0                       |
| C | 2.2768  | -2.8650 | -1.6587 | -29.9         | -17.9         | 149.9         | 34.0           | 173.7           | 0.10            | 152.6           | 147.3                       |
| C | -2.2495 | -2.7168 | -1.8958 | -24.5         | -15.3         | 142.4         | 34.2           | 162.3           | 0.09            | 152.5           | 147.1                       |
| C | 3.5489  | -1.8689 | 0.0363  | -30.2         | -18.4         | 151.3         | 34.2           | 175.6           | 0.10            | 152.5           | 147.1                       |
| C | 0.2212  | 0.7068  | -4.2694 | -31.1         | -16.8         | 152.9         | 35.0           | 176.8           | 0.12            | 151.7           | 146.3                       |

|   |         |         |         |       |       |       |      |       |      |       |       |
|---|---------|---------|---------|-------|-------|-------|------|-------|------|-------|-------|
| C | -1.2037 | -2.4508 | -2.8500 | -31.3 | -14.5 | 152.6 | 35.6 | 175.5 | 0.14 | 151.1 | 145.7 |
| C | -3.5708 | 0.7391  | -1.8552 | -40.7 | 0.1   | 147.9 | 35.8 | 168.2 | 0.36 | 150.9 | 145.5 |
| C | 3.3147  | -1.9170 | -1.3790 | -39.9 | -4.7  | 153.4 | 36.3 | 175.7 | 0.30 | 150.4 | 145.0 |
| C | -3.1711 | -2.4528 | 0.7797  | -24.4 | -18.0 | 152.5 | 36.7 | 173.6 | 0.06 | 150.0 | 144.6 |
| C | -1.8453 | -0.8908 | 3.9125  | -25.0 | 4.4   | 130.8 | 36.7 | 141.2 | 0.31 | 149.9 | 144.5 |
| C | 2.7622  | -2.9234 | 0.6353  | -35.1 | -0.1  | 146.2 | 37.0 | 163.8 | 0.32 | 149.7 | 144.3 |
| C | -2.4726 | 3.0351  | -0.6263 | -25.4 | -9.4  | 146.9 | 37.4 | 164.3 | 0.15 | 149.3 | 143.9 |
| C | -1.1904 | -3.6757 | 1.5389  | -21.8 | -14.8 | 149.5 | 37.6 | 167.8 | 0.06 | 149.0 | 143.7 |
| C | 1.3920  | 1.5012  | -3.9928 | -43.6 | 7.0   | 149.9 | 37.8 | 168.2 | 0.45 | 148.9 | 143.5 |
| C | -3.5695 | -0.3451 | 1.6893  | -40.9 | 2.4   | 152.3 | 37.9 | 171.6 | 0.38 | 148.7 | 143.4 |
| C | 0.5355  | -1.7133 | 4.1053  | -16.9 | -5.5  | 136.7 | 38.1 | 147.9 | 0.12 | 148.6 | 143.2 |
| C | 3.2480  | 1.5224  | -2.3727 | -31.4 | -4.4  | 150.2 | 38.1 | 168.1 | 0.24 | 148.5 | 143.1 |
| C | -2.1367 | 1.0487  | -3.6714 | -43.9 | 9.4   | 150.3 | 38.6 | 167.5 | 0.48 | 148.1 | 142.7 |
| C | 2.7845  | 2.7158  | -1.8358 | -32.7 | -4.3  | 153.5 | 38.8 | 171.9 | 0.25 | 147.9 | 142.5 |
| C | -0.7784 | 2.3890  | 3.2113  | -22.6 | -6.5  | 146.2 | 39.0 | 160.7 | 0.15 | 147.7 | 142.3 |
| C | 3.2868  | -0.5469 | 2.0353  | -20.4 | -7.7  | 145.7 | 39.2 | 159.7 | 0.12 | 147.5 | 142.1 |
| C | 0.8894  | 3.9734  | -1.3472 | -31.2 | -1.0  | 150.7 | 39.5 | 166.8 | 0.27 | 147.2 | 141.8 |
| C | 1.0126  | 1.2187  | 4.1878  | -16.7 | -8.5  | 143.8 | 39.5 | 156.3 | 0.08 | 147.2 | 141.8 |
| C | 2.5215  | 0.8922  | -3.4643 | -37.3 | 6.1   | 151.9 | 40.2 | 167.5 | 0.39 | 146.4 | 141.0 |
| C | -2.9170 | 1.7311  | -2.6527 | -32.8 | 3.0   | 150.7 | 40.3 | 165.6 | 0.32 | 146.4 | 141.0 |
| C | 3.7648  | 0.4890  | -1.5146 | -32.7 | 1.3   | 152.9 | 40.5 | 168.6 | 0.30 | 146.1 | 140.8 |
| C | -2.1477 | -3.4160 | 0.4983  | -20.1 | -7.5  | 149.3 | 40.6 | 163.2 | 0.12 | 146.1 | 140.7 |
| C | -2.2937 | 0.4582  | 3.5828  | -16.3 | -12.1 | 150.8 | 40.8 | 165.0 | 0.04 | 145.9 | 140.5 |
| C | 1.0025  | -3.3973 | 2.2645  | -24.8 | -3.7  | 151.2 | 40.9 | 165.4 | 0.19 | 145.8 | 140.4 |
| C | 2.7152  | 2.8576  | -0.3989 | -29.3 | 6.5   | 147.4 | 41.5 | 158.9 | 0.34 | 145.2 | 139.8 |
| C | 0.6742  | 2.3195  | 3.2959  | -11.6 | 10.9  | 127.3 | 42.2 | 127.6 | 0.26 | 144.5 | 139.1 |
| C | -3.7141 | 0.9030  | -0.4490 | -21.2 | -8.0  | 157.6 | 42.8 | 172.2 | 0.11 | 143.9 | 138.5 |
| C | 3.7512  | 0.6162  | -0.0976 | -19.9 | -5.8  | 154.1 | 42.8 | 166.9 | 0.13 | 143.9 | 138.5 |
| C | 1.2720  | -2.5612 | -2.6322 | -25.3 | -1.6  | 157.6 | 43.6 | 171.1 | 0.21 | 143.1 | 137.7 |
| C | -1.1507 | -1.2420 | -3.5944 | -24.4 | -2.2  | 158.3 | 43.9 | 171.6 | 0.19 | 142.8 | 137.4 |
| C | 1.3789  | -1.3355 | -3.4331 | -16.4 | -8.3  | 157.8 | 44.4 | 170.1 | 0.07 | 142.3 | 136.9 |
| C | -0.4992 | 4.0221  | -1.4130 | -34.1 | 15.7  | 151.6 | 44.4 | 160.7 | 0.46 | 142.3 | 136.9 |
| C | -3.2274 | -1.7238 | -1.6064 | -16.8 | -10.7 | 163.3 | 45.3 | 177.0 | 0.05 | 141.4 | 136.0 |
| C | 2.2705  | -2.8124 | 1.9561  | -18.5 | -2.3  | 159.0 | 46.1 | 169.4 | 0.14 | 140.6 | 135.2 |
| C | 2.6289  | -1.6390 | 2.7013  | -12.5 | 7.1   | 144.2 | 46.3 | 146.9 | 0.20 | 140.4 | 135.0 |
| C | 1.5409  | 3.6387  | -0.0971 | -31.1 | 20.3  | 150.5 | 46.6 | 155.9 | 0.49 | 140.1 | 134.7 |
| C | -1.2746 | 3.7275  | -0.2241 | -36.9 | 26.9  | 150.5 | 46.8 | 155.5 | 0.62 | 139.8 | 134.4 |
| C | 2.0521  | 0.3341  | 3.7939  | -10.6 | 20.0  | 133.3 | 47.6 | 128.6 | 0.36 | 139.1 | 133.7 |
| C | 0.1615  | -0.6813 | -3.9417 | -13.2 | -1.4  | 157.8 | 47.8 | 165.1 | 0.11 | 138.9 | 133.5 |
| C | -1.2293 | -2.9805 | 2.7880  | -14.0 | 10.4  | 147.4 | 47.9 | 149.2 | 0.25 | 138.7 | 133.4 |
| C | 2.6168  | 1.8370  | 1.8183  | -4.7  | 1.4   | 151.2 | 49.3 | 152.8 | 0.06 | 137.4 | 132.0 |
| C | 0.6410  | -3.9748 | -0.1405 | -12.8 | -1.3  | 163.0 | 49.6 | 170.0 | 0.10 | 137.0 | 131.7 |
| C | -2.2089 | -1.9699 | 3.0310  | -16.4 | 5.1   | 160.9 | 49.9 | 166.6 | 0.19 | 136.8 | 131.4 |

|    |         |         |        |       |      |       |      |       |      |       |       |
|----|---------|---------|--------|-------|------|-------|------|-------|------|-------|-------|
| C  | -2.6180 | 1.9512  | 1.5790 | -7.9  | 7.5  | 150.2 | 49.9 | 150.3 | 0.15 | 136.7 | 131.4 |
| C  | -3.1585 | -1.7076 | 2.0073 | -9.9  | 14.0 | 148.5 | 50.9 | 146.4 | 0.24 | 135.8 | 130.4 |
| C  | 1.8385  | -1.1174 | 3.7967 | -8.9  | 30.5 | 134.0 | 51.9 | 123.2 | 0.48 | 134.8 | 129.4 |
| C  | 3.7192  | -0.6162 | 0.6806 | -5.7  | -0.7 | 164.0 | 52.6 | 167.2 | 0.04 | 134.1 | 128.7 |
| C  | -3.0789 | 2.0510  | 0.2019 | -5.4  | 4.7  | 159.0 | 52.8 | 159.3 | 0.10 | 133.9 | 128.5 |
| C  | -0.6646 | 3.4597  | 1.0117 | -4.5  | 10.1 | 155.5 | 53.7 | 152.7 | 0.14 | 133.0 | 127.6 |
| C  | 3.1763  | 1.8393  | 0.4780 | -4.6  | 5.3  | 161.7 | 54.1 | 161.4 | 0.09 | 132.5 | 127.2 |
| C  | 1.4609  | 2.6550  | 2.1317 | -11.8 | 17.5 | 156.9 | 54.2 | 154.0 | 0.29 | 132.5 | 127.1 |
| C  | 0.1395  | -2.8044 | 3.2617 | -7.8  | 24.2 | 147.5 | 54.6 | 139.2 | 0.34 | 132.0 | 126.6 |
| C  | 2.8461  | 0.6720  | 2.6404 | -0.9  | 19.5 | 147.5 | 55.4 | 138.2 | 0.22 | 131.3 | 125.9 |
| C  | 0.8074  | 3.4202  | 1.0876 | 2.1   | 14.5 | 156.5 | 57.7 | 148.2 | 0.12 | 129.0 | 123.6 |
| C  | -1.4433 | 2.7153  | 1.9842 | 5.4   | 11.0 | 156.9 | 57.8 | 148.7 | 0.06 | 128.9 | 123.5 |
| C  | -2.9891 | 0.7589  | 2.3621 | 0.6   | 33.2 | 154.4 | 62.7 | 137.5 | 0.36 | 124.0 | 118.6 |
| Th | 0.0000  | 0.0000  | 2.1561 |       |      |       |      |       |      |       |       |

Th@C<sub>82</sub>

|   | X       | Y       | Z       | $\sigma_{11}$ | $\sigma_{22}$ | $\sigma_{33}$ | $\sigma_{iso}$ | $\sigma_{anis}$ | $\sigma_{asym}$ | $\delta$ vs TMS | $\delta$ vs C <sub>60</sub> |         |
|---|---------|---------|---------|---------------|---------------|---------------|----------------|-----------------|-----------------|-----------------|-----------------------------|---------|
| C | -1.3141 | 3.3578  | 2.6360  | -45.4         | 5.1           | 142.1         | 33.9           | 162.3           | 0.47            | 152.8           | 147.4                       | Average |
| C | -1.3141 | 3.3578  | -2.6360 | -45.4         | 5.1           | 142.1         | 33.9           | 162.3           | 0.47            | 152.8           | 147.4                       | 147.4   |
| C | -2.6567 | 0.1067  | 3.1621  | -32.3         | -10.3         | 144.4         | 33.9           | 165.7           | 0.20            | 152.7           | 147.4                       | Exp.    |
| C | -2.6567 | 0.1067  | -3.1621 | -32.3         | -10.3         | 144.4         | 33.9           | 165.7           | 0.20            | 152.7           | 147.4                       | 148.5   |
| C | 3.2429  | 3.0779  | 0.0000  | -45.4         | 5.5           | 142.1         | 34.0           | 162.0           | 0.47            | 152.7           | 147.3                       |         |
| C | -1.4034 | 0.0297  | -3.8878 | -32.2         | -9.8          | 144.3         | 34.1           | 165.3           | 0.20            | 152.6           | 147.2                       |         |
| C | -1.4034 | 0.0297  | 3.8878  | -32.2         | -9.8          | 144.3         | 34.1           | 165.3           | 0.20            | 152.6           | 147.2                       |         |
| C | 4.0628  | -0.3062 | 0.7253  | -32.1         | -9.5          | 144.5         | 34.3           | 165.3           | 0.20            | 152.4           | 147.0                       |         |
| C | 4.0628  | -0.3062 | -0.7253 | -32.1         | -9.5          | 144.5         | 34.3           | 165.3           | 0.20            | 152.4           | 147.0                       |         |
| C | -2.8488 | 1.4673  | 2.7406  | -27.6         | -15.8         | 150.4         | 35.7           | 172.1           | 0.10            | 151.0           | 145.6                       | Average |
| C | -2.8488 | 1.4673  | -2.7406 | -27.6         | -15.8         | 150.4         | 35.7           | 172.1           | 0.10            | 151.0           | 145.6                       | 145.6   |
| C | -0.8188 | 1.3430  | 3.9153  | -27.6         | -15.8         | 150.5         | 35.7           | 172.2           | 0.10            | 151.0           | 145.6                       | Exp.    |
| C | -0.8188 | 1.3430  | -3.9153 | -27.6         | -15.8         | 150.5         | 35.7           | 172.2           | 0.10            | 151.0           | 145.6                       | 146.3   |
| C | 3.9183  | 1.0517  | 1.1742  | -27.4         | -15.5         | 150.4         | 35.8           | 171.8           | 0.10            | 150.9           | 145.5                       |         |
| C | 3.9183  | 1.0517  | -1.1742 | -27.4         | -15.5         | 150.4         | 35.8           | 171.8           | 0.10            | 150.9           | 145.5                       |         |
| C | 0.2998  | 4.4714  | 1.4196  | -40.5         | -1.0          | 150.7         | 36.4           | 171.5           | 0.35            | 150.3           | 144.9                       | Average |
| C | 0.2998  | 4.4714  | -1.4196 | -40.5         | -1.0          | 150.7         | 36.4           | 171.5           | 0.35            | 150.3           | 144.9                       | 144.8   |
| C | 1.4964  | 4.3981  | -0.7278 | -40.3         | -1.0          | 150.7         | 36.5           | 171.4           | 0.34            | 150.2           | 144.8                       | Exp.    |
| C | 1.4964  | 4.3981  | 0.7278  | -40.3         | -1.0          | 150.7         | 36.5           | 171.4           | 0.34            | 150.2           | 144.8                       | 146.1   |
| C | -0.9584 | 4.5485  | 0.6920  | -40.5         | -0.7          | 150.7         | 36.5           | 171.3           | 0.35            | 150.2           | 144.8                       |         |
| C | -0.9584 | 4.5485  | -0.6920 | -40.4         | -0.7          | 150.7         | 36.5           | 171.3           | 0.35            | 150.2           | 144.8                       |         |
| C | -1.7572 | 2.2262  | 3.2823  | -42.6         | 0.0           | 155.7         | 37.7           | 177.0           | 0.36            | 149.0           | 143.6                       | Average |
| C | -1.7572 | 2.2262  | -3.2823 | -42.6         | 0.0           | 155.7         | 37.7           | 177.0           | 0.36            | 149.0           | 143.6                       | 143.6   |
| C | 3.9164  | 1.8775  | 0.0000  | -42.5         | -0.1          | 155.7         | 37.7           | 177.0           | 0.36            | 149.0           | 143.6                       | Exp.    |
| C | -3.9393 | 0.7060  | 0.7188  | -21.1         | -13.8         | 148.5         | 37.9           | 166.0           | 0.07            | 148.8           | 143.4                       | 145.1   |

|   |         |         |         |       |       |       |      |       |      |       |       |               |
|---|---------|---------|---------|-------|-------|-------|------|-------|------|-------|-------|---------------|
| C | -3.9393 | 0.7060  | -0.7188 | -21.1 | -13.8 | 148.5 | 37.9 | 166.0 | 0.07 | 148.8 | 143.4 |               |
| C | 2.6405  | 0.3024  | 3.0878  | -21.0 | -13.7 | 148.4 | 37.9 | 165.7 | 0.07 | 148.8 | 143.4 |               |
| C | 2.6405  | 0.3024  | -3.0878 | -21.0 | -13.7 | 148.4 | 37.9 | 165.7 | 0.07 | 148.8 | 143.4 |               |
| C | 1.3979  | 0.3786  | 3.8064  | -21.0 | -13.7 | 148.5 | 37.9 | 165.9 | 0.07 | 148.7 | 143.3 |               |
| C | 1.3979  | 0.3786  | -3.8064 | -21.0 | -13.7 | 148.5 | 38.0 | 165.9 | 0.07 | 148.7 | 143.3 |               |
| C | -2.3059 | -2.1619 | -2.3405 | -20.0 | -12.4 | 146.4 | 38.0 | 162.6 | 0.07 | 148.7 | 143.3 | Average       |
| C | -2.3059 | -2.1619 | 2.3405  | -20.0 | -12.4 | 146.4 | 38.0 | 162.6 | 0.07 | 148.7 | 143.3 | 143.3         |
| C | -1.0742 | -2.2379 | 3.0532  | -19.6 | -12.1 | 146.3 | 38.2 | 162.1 | 0.07 | 148.5 | 143.1 | Exp.          |
| C | -1.0742 | -2.2379 | -3.0532 | -19.6 | -12.1 | 146.3 | 38.2 | 162.1 | 0.07 | 148.5 | 143.1 | 144.9         |
| C | 2.9679  | -2.4850 | 0.7123  | -19.0 | -12.0 | 146.2 | 38.4 | 161.7 | 0.06 | 148.3 | 142.9 |               |
| C | 2.9679  | -2.4850 | -0.7123 | -19.0 | -12.0 | 146.2 | 38.4 | 161.7 | 0.06 | 148.3 | 142.9 |               |
| C | 0.0993  | 3.6594  | 2.5854  | -22.6 | -13.5 | 153.7 | 39.2 | 171.7 | 0.08 | 147.5 | 142.1 | Average       |
| C | 0.0993  | 3.6594  | -2.5854 | -22.6 | -13.5 | 153.7 | 39.2 | 171.7 | 0.08 | 147.5 | 142.1 | 142.1         |
| C | -1.9414 | 3.7847  | -1.4053 | -22.5 | -13.5 | 153.7 | 39.2 | 171.7 | 0.08 | 147.4 | 142.0 | Exp.          |
| C | -1.9414 | 3.7847  | 1.4053  | -22.5 | -13.5 | 153.7 | 39.2 | 171.7 | 0.08 | 147.4 | 142.0 | 142.4         |
| C | 2.5287  | 3.5105  | 1.1803  | -22.2 | -13.4 | 153.8 | 39.4 | 171.6 | 0.08 | 147.3 | 141.9 |               |
| C | 2.5287  | 3.5105  | -1.1803 | -22.2 | -13.4 | 153.8 | 39.4 | 171.6 | 0.08 | 147.3 | 141.9 |               |
| C | -3.8047 | -0.6504 | -1.1630 | -19.8 | -7.3  | 146.8 | 39.9 | 160.4 | 0.12 | 146.8 | 141.4 | Average       |
| C | -3.8047 | -0.6504 | 1.1630  | -19.8 | -7.3  | 146.8 | 39.9 | 160.4 | 0.12 | 146.8 | 141.4 | 141.4         |
| C | 2.8335  | -1.0577 | 2.6773  | -20.0 | -6.8  | 146.8 | 40.0 | 160.2 | 0.12 | 146.7 | 141.3 | Exp.          |
| C | 2.8335  | -1.0577 | -2.6773 | -20.0 | -6.8  | 146.8 | 40.0 | 160.2 | 0.12 | 146.7 | 141.3 | 141.4         |
| C | -0.2497 | -4.1344 | 0.0000  | -10.6 | -10.3 | 141.2 | 40.1 | 151.6 | 0.00 | 146.6 | 141.2 |               |
| C | 0.8225  | -0.9342 | 3.8400  | -19.5 | -6.9  | 146.8 | 40.1 | 160.1 | 0.12 | 146.5 | 141.2 |               |
| C | 0.8225  | -0.9342 | -3.8400 | -19.5 | -6.9  | 146.8 | 40.1 | 160.1 | 0.12 | 146.5 | 141.2 |               |
| C | 1.7001  | -1.8334 | 3.1266  | -17.5 | 0.0   | 147.7 | 43.4 | 156.5 | 0.17 | 143.3 | 137.9 | Average       |
| C | 1.7001  | -1.8334 | -3.1266 | -17.5 | 0.0   | 147.7 | 43.4 | 156.5 | 0.17 | 143.3 | 137.9 | 137.8         |
| C | -3.7061 | -1.5018 | 0.0000  | -17.3 | -0.6  | 148.2 | 43.4 | 157.2 | 0.16 | 143.2 | 137.8 | Exp.<br>136.9 |
| C | -2.8883 | 2.9566  | 0.7334  | -16.5 | -5.6  | 157.5 | 45.1 | 168.5 | 0.10 | 141.6 | 136.2 | Average       |
| C | -2.8883 | 2.9566  | -0.7334 | -16.5 | -5.6  | 157.5 | 45.1 | 168.5 | 0.10 | 141.6 | 136.2 | 136.1         |
| C | 1.1899  | -3.8687 | 0.0000  | -4.3  | 6.6   | 133.2 | 45.2 | 132.0 | 0.12 | 141.5 | 136.1 | Exp.          |
| C | 1.0721  | 2.7133  | -3.0238 | -16.5 | -5.5  | 157.5 | 45.2 | 168.5 | 0.10 | 141.5 | 136.1 | 136.5         |
| C | 1.0721  | 2.7133  | 3.0238  | -16.5 | -5.5  | 157.5 | 45.2 | 168.5 | 0.10 | 141.5 | 136.1 |               |
| C | 2.3398  | 2.6355  | 2.2904  | -16.3 | -5.5  | 157.5 | 45.2 | 168.4 | 0.10 | 141.5 | 136.1 |               |
| C | 2.3398  | 2.6355  | -2.2904 | -16.3 | -5.5  | 157.5 | 45.2 | 168.4 | 0.10 | 141.5 | 136.1 |               |
| C | -3.3915 | 1.7884  | 1.4600  | -20.9 | -2.3  | 158.8 | 45.2 | 170.4 | 0.16 | 141.4 | 136.1 |               |
| C | -3.3915 | 1.7884  | -1.4600 | -20.9 | -2.3  | 158.8 | 45.2 | 170.4 | 0.16 | 141.4 | 136.1 |               |
| C | 0.5857  | 1.5445  | 3.7605  | -20.7 | -2.2  | 158.8 | 45.3 | 170.3 | 0.16 | 141.4 | 136.0 |               |
| C | 0.5857  | 1.5445  | -3.7605 | -20.7 | -2.2  | 158.8 | 45.3 | 170.3 | 0.16 | 141.4 | 136.0 |               |
| C | 3.1093  | 1.3896  | 2.3006  | -20.4 | -2.1  | 158.9 | 45.5 | 170.2 | 0.16 | 141.2 | 135.8 |               |
| C | 3.1093  | 1.3896  | -2.3006 | -20.4 | -2.1  | 158.9 | 45.5 | 170.2 | 0.16 | 141.2 | 135.8 |               |
| C | -0.9349 | -3.7315 | 1.2284  | -4.1  | 8.0   | 133.6 | 45.8 | 131.6 | 0.14 | 140.8 | 135.5 |               |
| C | -0.9349 | -3.7315 | -1.2284 | -4.1  | 8.0   | 133.6 | 45.8 | 131.6 | 0.14 | 140.8 | 135.5 |               |
| C | -2.9019 | -2.6712 | 0.0000  | -9.4  | 12.0  | 147.9 | 50.2 | 146.6 | 0.22 | 136.5 | 131.1 | Average       |
| C | 1.1968  | -2.9263 | 2.3728  | -8.5  | 12.2  | 147.2 | 50.3 | 145.4 | 0.21 | 136.4 | 131.0 | 131.0         |
| C | 1.1968  | -2.9263 | -2.3728 | -8.5  | 12.2  | 147.2 | 50.3 | 145.4 | 0.21 | 136.4 | 131.0 | Exp.<br>130.9 |

|    |         |         |         |      |      |       |      |       |      |       |       |               |
|----|---------|---------|---------|------|------|-------|------|-------|------|-------|-------|---------------|
| C  | 1.8750  | -3.2957 | -1.1629 | -0.3 | 16.0 | 139.1 | 51.6 | 131.2 | 0.19 | 135.1 | 129.7 | Average       |
| C  | 1.8750  | -3.2957 | 1.1629  | -0.3 | 16.0 | 139.1 | 51.6 | 131.2 | 0.19 | 135.1 | 129.7 | 129.4         |
| C  | -2.2255 | -3.0387 | 1.2101  | -0.2 | 16.2 | 139.6 | 51.9 | 131.6 | 0.19 | 134.8 | 129.4 | Exp.<br>130.9 |
| C  | -2.2255 | -3.0387 | -1.2101 | -0.2 | 16.2 | 139.6 | 51.9 | 131.6 | 0.19 | 134.8 | 129.4 |               |
| C  | -0.2177 | -3.1655 | 2.3745  | -0.4 | 17.0 | 139.4 | 52.0 | 131.0 | 0.20 | 134.7 | 129.3 |               |
| C  | -0.2177 | -3.1655 | -2.3745 | -0.4 | 17.0 | 139.4 | 52.0 | 131.0 | 0.20 | 134.7 | 129.3 |               |
| C  | -0.5837 | -1.1199 | 3.8089  | -4.7 | 12.2 | 162.6 | 56.7 | 158.8 | 0.16 | 130.0 | 124.6 | Average       |
| C  | -0.5837 | -1.1199 | -3.8089 | -4.7 | 12.2 | 162.6 | 56.7 | 158.8 | 0.16 | 130.0 | 124.6 | 124.4         |
| C  | -3.0991 | -0.9656 | 2.3528  | -4.5 | 12.5 | 162.7 | 56.9 | 158.7 | 0.16 | 129.8 | 124.4 | Exp.<br>128.5 |
| C  | -3.0991 | -0.9656 | -2.3528 | -4.5 | 12.5 | 162.7 | 56.9 | 158.7 | 0.16 | 129.8 | 124.4 |               |
| C  | 3.4828  | -1.3691 | 1.4553  | -4.7 | 13.1 | 162.5 | 57.0 | 158.3 | 0.17 | 129.7 | 124.3 |               |
| C  | 3.4828  | -1.3691 | -1.4553 | -4.7 | 13.1 | 162.5 | 57.0 | 158.3 | 0.17 | 129.7 | 124.3 |               |
| Th | -0.0834 | -1.7442 | 0.0000  |      |      |       |      |       |      |       |       |               |

Th@C<sub>86</sub>

|   | X       | Y       | Z       | $\sigma_{11}$ | $\sigma_{22}$ | $\sigma_{33}$ | $\sigma_{iso}$ | $\sigma_{anis}$ | $\sigma_{asym}$ | $\delta$ vs TMS | $\delta$ vs C <sub>60</sub> | Average per<br>type |
|---|---------|---------|---------|---------------|---------------|---------------|----------------|-----------------|-----------------|-----------------|-----------------------------|---------------------|
| C | -4.2141 | 1.1330  | 0.3746  | -47.4         | -24.8         | 143.0         | 23.6           | 179.1           | 0.19            | 163.1           | 157.7                       | 157.7               |
| C | -0.5952 | -1.2079 | 4.1117  | -57.5         | -20.0         | 158.8         | 27.1           | 197.5           | 0.28            | 159.6           | 154.2                       | 154.2               |
| C | -2.8658 | 2.5568  | 1.8108  | -30.7         | -27.6         | 142.2         | 28.0           | 171.4           | 0.03            | 158.7           | 153.3                       | 153.3               |
| C | -3.1893 | 1.4228  | -3.0214 | -46.2         | -21.7         | 154.9         | 29.0           | 188.9           | 0.19            | 157.7           | 152.3                       | 152.3               |
| C | -3.4097 | 0.2911  | 2.5040  | -35.5         | -18.9         | 143.3         | 29.6           | 170.5           | 0.15            | 157.1           | 151.7                       | 151.7               |
| C | -2.9039 | -1.0021 | -3.3663 | -42.4         | -28.6         | 160.4         | 29.8           | 195.9           | 0.11            | 156.9           | 151.5                       | 151.5               |
| C | -3.7347 | -1.2553 | -2.2095 | -45.6         | -17.2         | 153.1         | 30.1           | 184.5           | 0.23            | 156.6           | 151.2                       | 151.2               |
| C | -1.7790 | 2.5816  | 2.7564  | -45.5         | -7.8          | 153.1         | 33.2           | 179.7           | 0.31            | 153.4           | 148.0                       | 148.0               |
| C | -2.6212 | 0.3142  | -3.7610 | -45.7         | -7.0          | 154.1         | 33.8           | 180.4           | 0.32            | 152.9           | 147.5                       | 147.5               |
| C | 2.1074  | 3.6624  | -0.7105 | -42.1         | -12.9         | 157.7         | 34.2           | 185.2           | 0.24            | 152.5           | 147.1                       | 147.1               |
| C | 3.1945  | 2.0176  | 2.2640  | -43.7         | -10.4         | 156.7         | 34.2           | 183.7           | 0.27            | 152.4           | 147.1                       |                     |
| C | -2.3681 | 0.3477  | 3.4982  | -34.7         | -15.7         | 155.4         | 35.0           | 180.6           | 0.16            | 151.7           | 146.3                       | 146.3               |
| C | 0.3066  | -0.0937 | 4.3162  | -29.1         | -22.3         | 156.7         | 35.1           | 182.4           | 0.06            | 151.6           | 146.2                       | 146.2               |
| C | -3.9142 | 1.9854  | -0.7542 | -30.1         | -22.5         | 158.1         | 35.2           | 184.4           | 0.06            | 151.5           | 146.1                       |                     |
| C | -4.0213 | 1.1798  | -1.9335 | -45.9         | 0.0           | 153.9         | 36.0           | 176.9           | 0.39            | 150.7           | 145.3                       | 145.3               |
| C | 0.3709  | 3.4814  | -2.4241 | -23.0         | -21.0         | 156.6         | 37.5           | 178.7           | 0.02            | 149.2           | 143.8                       | 143.8               |
| C | -2.4919 | 3.3447  | 0.6690  | -26.3         | -18.9         | 158.5         | 37.8           | 181.1           | 0.06            | 148.9           | 143.5                       | 143.5               |
| C | 2.8160  | 3.0111  | 1.3788  | -46.8         | 5.8           | 155.3         | 38.1           | 175.8           | 0.45            | 148.6           | 143.2                       | 143.2               |
| C | -1.8885 | -0.9848 | 3.6745  | -49.1         | 11.9          | 151.7         | 38.2           | 170.4           | 0.54            | 148.5           | 143.1                       |                     |
| C | -1.2808 | 0.6776  | -4.1455 | -30.7         | -11.4         | 156.9         | 38.3           | 177.9           | 0.16            | 148.4           | 143.0                       | 143.0               |
| C | -0.7498 | 3.4188  | 2.2150  | -26.8         | -11.9         | 153.6         | 38.3           | 173.0           | 0.13            | 148.4           | 143.0                       |                     |
| C | -1.0899 | 2.0534  | -3.7453 | -46.4         | 10.9          | 150.6         | 38.3           | 168.4           | 0.51            | 148.3           | 143.0                       |                     |
| C | 1.5451  | 3.6691  | 1.5377  | -24.0         | -14.7         | 154.0         | 38.4           | 173.4           | 0.08            | 148.2           | 142.9                       | 142.8               |
| C | -1.8582 | -1.9718 | -3.3848 | -32.9         | -5.8          | 154.2         | 38.5           | 173.6           | 0.23            | 148.2           | 142.8                       |                     |

|   |         |         |         |       |       |       |      |       |      |       |       |       |
|---|---------|---------|---------|-------|-------|-------|------|-------|------|-------|-------|-------|
| C | 3.8998  | 0.8712  | 1.7724  | -31.4 | -4.0  | 150.9 | 38.5 | 168.6 | 0.24 | 148.2 | 142.8 |       |
| C | 2.3121  | 1.6118  | 3.3371  | -28.0 | -16.4 | 159.9 | 38.5 | 182.0 | 0.10 | 148.2 | 142.8 |       |
| C | 3.1192  | 2.9027  | -0.0266 | -28.4 | -13.2 | 158.7 | 39.0 | 179.4 | 0.13 | 147.6 | 142.2 | 142.2 |
| C | -4.3005 | -0.1897 | -1.5212 | -37.7 | -2.4  | 157.4 | 39.1 | 177.4 | 0.30 | 147.5 | 142.2 |       |
| C | 1.7360  | 3.3222  | -1.9933 | -33.8 | 0.3   | 152.0 | 39.5 | 168.7 | 0.30 | 147.2 | 141.8 | 141.8 |
| C | -3.4753 | -1.0523 | 1.9884  | -26.2 | -11.7 | 159.1 | 40.4 | 178.0 | 0.12 | 146.3 | 140.9 | 140.9 |
| C | -2.2073 | 2.4835  | -2.9467 | -22.7 | -11.9 | 156.7 | 40.7 | 174.0 | 0.09 | 146.0 | 140.6 | 140.6 |
| C | 1.1094  | 4.0995  | 0.2304  | -24.0 | -6.2  | 152.9 | 40.9 | 168.0 | 0.16 | 145.8 | 140.4 | 140.4 |
| C | 2.5261  | -2.9938 | -2.2678 | -18.5 | 8.3   | 133.6 | 41.1 | 138.7 | 0.29 | 145.6 | 140.2 | 140.2 |
| C | 1.5480  | -1.9680 | 3.6294  | -38.8 | 15.8  | 146.8 | 41.3 | 158.2 | 0.52 | 145.4 | 140.0 | 140.0 |
| C | -1.1853 | 3.8773  | 0.9181  | -18.5 | -11.2 | 153.5 | 41.3 | 168.4 | 0.07 | 145.4 | 140.0 |       |
| C | 3.5559  | -2.4990 | -1.3866 | -9.0  | -5.4  | 138.8 | 41.5 | 145.9 | 0.04 | 145.2 | 139.8 | 139.8 |
| C | -1.4675 | 1.4620  | 3.5696  | -27.4 | -2.7  | 155.8 | 41.9 | 170.9 | 0.22 | 144.7 | 139.4 | 139.4 |
| C | 2.6213  | 0.2381  | 3.6161  | -30.1 | -0.1  | 157.5 | 42.4 | 172.6 | 0.26 | 144.3 | 138.9 | 138.9 |
| C | -0.6710 | 3.7964  | -1.5056 | -19.4 | -11.2 | 158.3 | 42.6 | 173.7 | 0.07 | 144.1 | 138.7 | 138.6 |
| C | -2.4915 | -1.8365 | 2.6691  | -28.1 | -2.3  | 158.4 | 42.7 | 173.6 | 0.22 | 144.0 | 138.6 |       |
| C | 3.5744  | -0.2481 | 2.6420  | -28.0 | 4.8   | 151.5 | 42.8 | 163.1 | 0.30 | 143.9 | 138.5 |       |
| C | 0.1721  | 2.5233  | -3.4722 | -37.6 | 11.2  | 155.4 | 43.0 | 168.6 | 0.43 | 143.7 | 138.3 | 138.2 |
| C | -3.1608 | -2.3642 | -1.4778 | -23.5 | -8.2  | 161.2 | 43.2 | 177.0 | 0.13 | 143.5 | 138.1 |       |
| C | 0.1350  | -2.3245 | 3.6105  | -33.1 | 15.1  | 148.4 | 43.5 | 157.4 | 0.46 | 143.2 | 137.8 | 137.8 |
| C | -0.0641 | 1.2301  | 3.9414  | -18.8 | -12.7 | 162.2 | 43.6 | 177.9 | 0.05 | 143.1 | 137.7 |       |
| C | -2.9274 | 3.0180  | -0.6440 | -20.2 | -7.1  | 159.0 | 43.9 | 172.6 | 0.11 | 142.8 | 137.4 | 137.4 |
| C | 1.6316  | -0.6035 | 4.0990  | -32.1 | 5.1   | 158.7 | 43.9 | 172.2 | 0.32 | 142.8 | 137.4 |       |
| C | 0.9829  | 2.1154  | 3.4231  | -21.3 | -7.7  | 162.3 | 44.4 | 176.9 | 0.12 | 142.2 | 136.8 | 136.7 |
| C | 1.5000  | -4.3046 | -0.3554 | -3.8  | 2.3   | 135.8 | 44.8 | 136.5 | 0.07 | 141.9 | 136.5 |       |
| C | 1.3120  | 1.6340  | -3.5273 | -17.3 | -1.0  | 154.5 | 45.4 | 163.7 | 0.15 | 141.3 | 135.9 | 135.9 |
| C | 1.5085  | -3.9197 | -1.7560 | -10.8 | 9.5   | 138.5 | 45.7 | 139.2 | 0.22 | 140.9 | 135.5 | 135.5 |
| C | 2.5682  | -3.8483 | 0.5197  | -10.9 | 12.8  | 136.7 | 46.2 | 135.8 | 0.26 | 140.5 | 135.1 | 134.9 |
| C | 2.4626  | -2.4625 | 2.6816  | -15.2 | 1.4   | 153.0 | 46.4 | 159.9 | 0.16 | 140.3 | 134.9 |       |
| C | -4.3766 | -0.2238 | -0.0966 | -18.7 | -0.2  | 158.1 | 46.4 | 167.5 | 0.17 | 140.2 | 134.9 |       |
| C | 2.2930  | 2.1394  | -2.6100 | -19.7 | 5.9   | 154.4 | 46.9 | 161.3 | 0.24 | 139.8 | 134.4 | 134.4 |
| C | -3.8323 | -1.3191 | 0.6467  | -25.0 | 1.3   | 164.4 | 46.9 | 176.3 | 0.22 | 139.8 | 134.4 |       |
| C | 0.4945  | -2.4595 | -3.2647 | -10.0 | 0.0   | 150.8 | 46.9 | 155.9 | 0.10 | 139.8 | 134.4 |       |
| C | 0.5508  | -3.7305 | 1.6987  | -7.8  | -1.6  | 151.7 | 47.4 | 156.4 | 0.06 | 139.3 | 133.9 | 133.8 |
| C | 3.5067  | -1.5712 | 2.1661  | -16.5 | 6.7   | 152.5 | 47.6 | 157.4 | 0.22 | 139.1 | 133.7 |       |
| C | -3.6758 | 1.3979  | 1.6571  | -16.8 | -10.7 | 171.6 | 48.0 | 185.3 | 0.05 | 138.6 | 133.3 |       |
| C | -2.0113 | 3.2575  | -1.7663 | -10.1 | -2.1  | 158.2 | 48.6 | 164.3 | 0.07 | 138.0 | 132.7 | 132.6 |
| C | -0.2045 | -0.2434 | -4.0912 | -9.7  | -5.1  | 160.9 | 48.7 | 168.3 | 0.04 | 138.0 | 132.6 |       |
| C | 0.6181  | 3.2126  | 2.5190  | -22.5 | 3.6   | 165.4 | 48.8 | 174.9 | 0.22 | 137.8 | 132.5 |       |
| C | 3.6304  | 1.6966  | -0.5692 | -18.5 | 4.0   | 161.6 | 49.0 | 168.8 | 0.20 | 137.7 | 132.3 | 132.3 |
| C | -2.0710 | -2.8737 | -2.2551 | -36.6 | 30.5  | 155.0 | 49.6 | 158.0 | 0.64 | 137.0 | 131.7 | 131.7 |
| C | -0.2674 | 4.1194  | -0.1350 | -17.9 | 2.8   | 164.3 | 49.7 | 171.9 | 0.18 | 136.9 | 131.6 | 131.6 |



|   |         |         |         |       |      |       |      |       |      |       |       |       |
|---|---------|---------|---------|-------|------|-------|------|-------|------|-------|-------|-------|
| C | 3.6074  | -2.9478 | -0.0028 | -3.9  | 18.7 | 134.6 | 49.8 | 127.2 | 0.27 | 136.9 | 131.5 | 131.5 |
| C | 4.1377  | -0.6661 | -0.0712 | -6.7  | 5.5  | 152.5 | 50.4 | 153.1 | 0.12 | 136.3 | 130.9 | 130.9 |
| C | 1.9697  | -3.4839 | 1.7825  | -7.8  | 28.3 | 137.7 | 52.7 | 127.4 | 0.42 | 134.0 | 128.6 | 128.6 |
| C | -1.0274 | -3.7686 | -0.2203 | -5.6  | 5.5  | 159.9 | 53.3 | 159.9 | 0.10 | 133.4 | 128.0 | 128.0 |
| C | 1.1471  | 0.2501  | -3.7653 | -4.4  | -0.8 | 167.6 | 54.1 | 170.2 | 0.03 | 132.5 | 127.1 | 127.1 |
| C | -1.7279 | -2.8219 | 2.0052  | -15.8 | 13.6 | 164.9 | 54.2 | 166.0 | 0.27 | 132.4 | 127.0 | 127.0 |
| C | 1.8531  | -2.0416 | -3.1199 | -5.7  | 21.4 | 147.4 | 54.4 | 139.5 | 0.29 | 132.3 | 126.9 | 126.9 |
| C | 4.0729  | 0.6852  | 0.3770  | -4.5  | 0.0  | 170.4 | 55.3 | 172.7 | 0.04 | 131.4 | 126.0 | 126.0 |
| C | -0.4003 | -3.0999 | 2.5447  | -7.0  | 6.5  | 166.5 | 55.3 | 166.8 | 0.12 | 131.3 | 125.9 | 125.9 |
| C | 3.1757  | 1.2818  | -1.9059 | -5.2  | 3.9  | 168.1 | 55.6 | 168.8 | 0.08 | 131.1 | 125.7 | 125.7 |
| C | -1.0280 | -3.5879 | -1.6598 | -11.1 | 15.1 | 163.9 | 56.0 | 161.9 | 0.24 | 130.7 | 125.3 | 125.2 |
| C | -0.5396 | -1.6175 | -3.7572 | -4.8  | 1.6  | 171.5 | 56.1 | 173.1 | 0.06 | 130.6 | 125.2 |       |
| C | 2.1605  | -0.6241 | -3.2071 | 5.1   | 7.4  | 155.8 | 56.1 | 149.5 | 0.02 | 130.6 | 125.2 |       |
| C | -2.0281 | -3.1101 | 0.5981  | -4.9  | 7.9  | 166.3 | 56.4 | 164.9 | 0.12 | 130.2 | 124.9 | 124.9 |
| C | 3.1669  | -0.1154 | -2.2953 | 1.2   | 10.6 | 157.5 | 56.4 | 151.7 | 0.09 | 130.2 | 124.9 |       |
| C | -3.1262 | -2.3917 | -0.0567 | -2.3  | 8.4  | 163.7 | 56.6 | 160.7 | 0.10 | 130.1 | 124.7 | 124.7 |
| C | 3.9404  | -1.7935 | 0.8033  | 4.7   | 21.8 | 144.6 | 57.0 | 131.3 | 0.19 | 129.7 | 124.3 | 124.3 |
| C | 0.2565  | -3.5311 | -2.3362 | 1.1   | 25.4 | 148.5 | 58.3 | 135.3 | 0.27 | 128.4 | 123.0 | 123.0 |
| C | 0.2397  | -4.1537 | 0.3697  | 3.2   | 23.0 | 150.3 | 58.8 | 137.2 | 0.22 | 127.8 | 122.4 | 122.4 |
| C | 3.8059  | -1.0684 | -1.4046 | 4.9   | 27.6 | 149.8 | 60.8 | 133.6 | 0.26 | 125.9 | 120.5 | 120.5 |

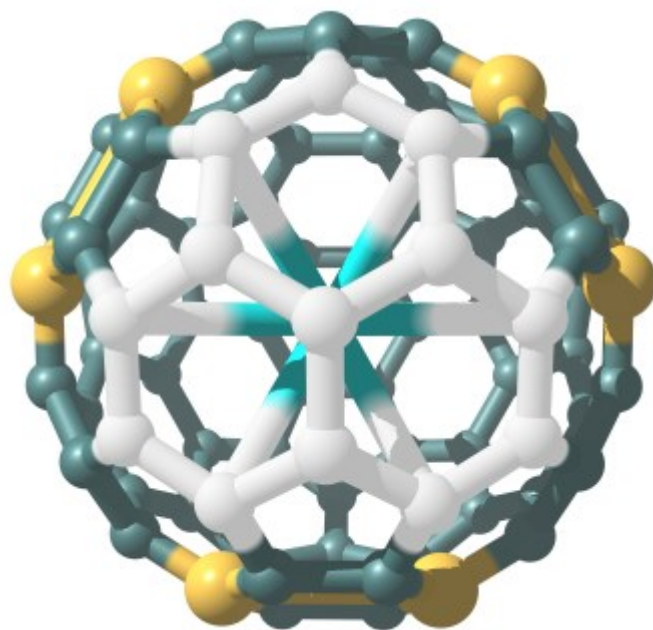

Figure S1. Most shielded carbon atoms calculated at 124.4 ppm (Exp. 128.5 ppm), in yellow for Th@C<sub>82</sub>. Three-fused six-membered rings motif coordinating Th is given in white.

Table S2. Energy decomposition analysis for the Th-Fullerene interaction. Values in kcal mol<sup>-1</sup>.

|                           | Th@C <sub>76</sub> |       | Th@C <sub>80</sub> |       | Th@C <sub>82</sub> |       | Th@C <sub>86</sub> |       | Average* |
|---------------------------|--------------------|-------|--------------------|-------|--------------------|-------|--------------------|-------|----------|
| $\Delta E_{\text{Pauli}}$ | 870.9              |       | 816.1              |       | 822.3              |       | 904.8              |       |          |
| $\Delta E_{\text{Estat}}$ | -509.9             | 47.6% | -487.6             | 47.9% | -487.1             | 46.6% | -527.4             | 48.0% | 47.5%    |
| $\Delta E_{\text{Orb}}$   | -550.2             | 51.4% | -524.6             | 51.5% | -547.0             | 52.3% | -562.9             | 51.2% | 51.6%    |
| $\Delta E_{\text{Disp}}$  | -11.1              | 1.0%  | -6.4               | 0.6%  | -11.9              | 1.1%  | -9.5               | 0.9%  | 0.9%     |
| $\Delta E_{\text{int}}$   | -200.3             |       | -202.4             |       | -223.7             |       | -195.0             |       |          |

\*Average depicted at the main text.

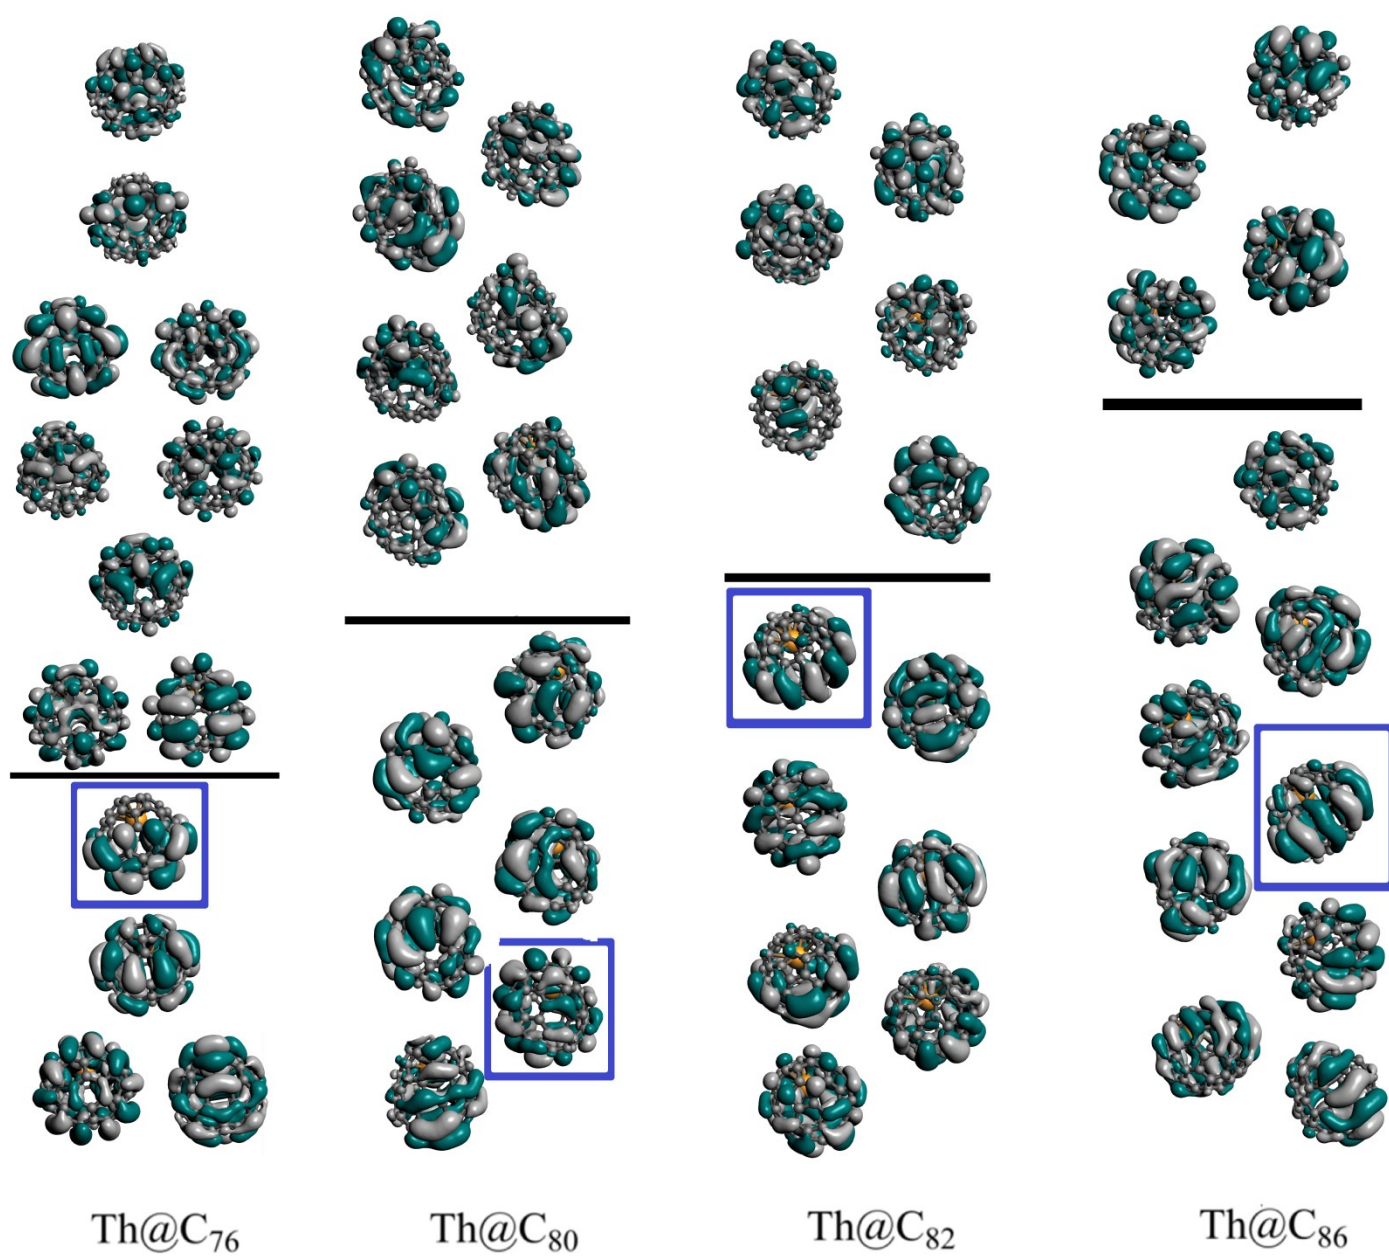

Figure S2. Frontier molecular orbitals for the studied series depicting the I-shell. Blue boxes denote MOs given at Figure 4 from the main document. Black lines shows the HOMO (below) and LUMO (above) limit.
